# Supplementary material
Source: PubMed Central journal article supplement (PMC6108869)
Supplement: EHP3189.s001.acco.pdf [file EHP3189.s001.acco.pdf]

**Note to readers with disabilities:** *EHP* strives to ensure that all journal content is accessible to all readers. However, some figures and Supplemental Material published in *EHP* articles may not conform to [508 standards](#) due to the complexity of the information being presented. If you need assistance accessing journal content, please contact [ehp508@niehs.nih.gov](mailto:ehp508@niehs.nih.gov). Our staff will work with you to assess and meet your accessibility needs within 3 working days.

### **Supplemental Material**

#### **Evaluation of Prenatal Exposure to Bisphenol Analogues on Development and Long-Term Health of the Mammary Gland in Female Mice**

Deirdre K. Tucker, Schantel Hayes Bouknight, Sukhdev S. Brar, Grace E. Kissling, and Suzanne E. Fenton

#### **Table of Contents**

**Figure S1.** Pubertal and adult body weight gain in female offspring of CD-1 dams treated from gestation day (GD) 10 - GD 17 with A) bisphenol A (BPA), B) bisphenol AF (BPAF), or C) bisphenol S (BPS). \*  $p < 0.05$  is statistically significant on PND 35 in BPAF 0.5 mg/kg/bw and BPS 5 mg/kg/bw groups compared to vehicle control using ANOVA and a Dunnett's t-test. Litters: Vehicle (n = 9), BPA 0.5 (n = 12), BPA 5 (n = 12), BPA 50 (n = 9), BPAF 0.05 (n = 9), BPAF 0.5 (n = 11), BPAF 5 (n = 11), BPS 0.05 (n = 12), BPS 0.5 (n = 11) and BPS (n = 10).

**Figure S2.** Effects of prenatal bisphenol A (BPA), bisphenol AF (BPAF), or bisphenol S (BPS) exposure on female serum hormone levels at 3, 8, and 14 months. A, D, G, and J = 3 months; B, E, H, and K = 8 months; and C, F, I, and L = 14 months. Mean  $\pm$  SEM. Litter n=2-6 per treatment group. \* $p < 0.05$  and \*\* $p < 0.01$  is statistically significant compared to vehicle control by ANOVA and Dunnett's test.

**Table S1.** Record of vehicle and treated animals  $\geq$  3 months of age with mammary gland diagnoses by age.

**Table S2.** Number of days (d) spent in estrus, diestrus and proestrus following in utero exposure to bisphenol A (BPA), bisphenol AF (BPAF), or bisphenol S (BPS) during postnatal days (PND) 63-83.

A)

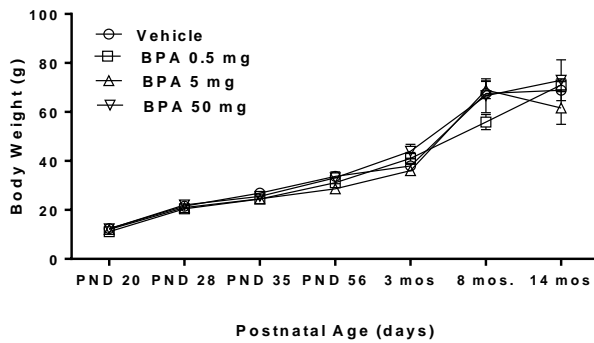

B)

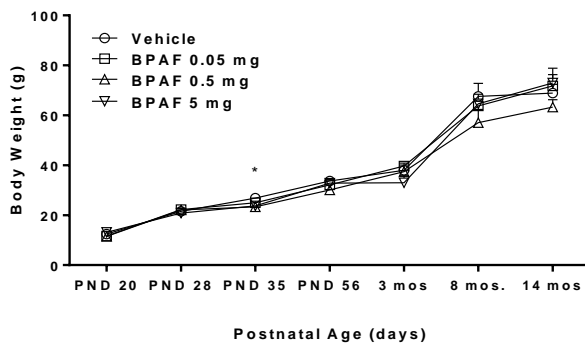

C)

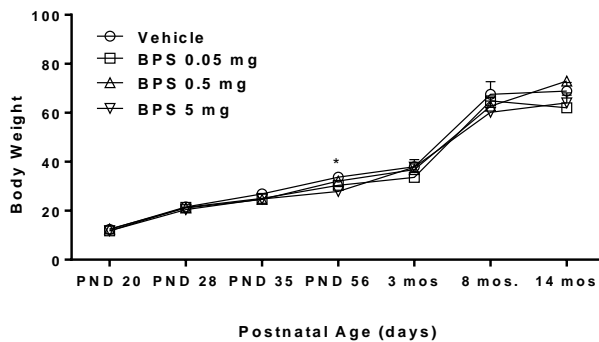

**Figure S1.** Pubertal and adult body weight gain in female offspring of CD-1 dams treated from gestation day (GD) 10 - GD 17 with A) bisphenol A (BPA), B) bisphenol AF (BPAF), or C) bisphenol S (BPS). \*  $p < 0.05$  is statistically significant on PND 35 in BPAF 0.5 mg/kg/bw and BPS 5 mg/kg/bw groups compared to vehicle control using ANOVA and a Dunnett's t-test. Litters: Vehicle (n = 9), BPA 0.5 (n = 12), BPA 5 (n = 12), BPA 50 (n = 9), BPAF 0.05 (n = 9), BPAF 0.5 (n = 11), BPAF 5 (n = 11), BPS 0.05 (n = 12), BPS 0.5 (n = 11) and BPS (n = 10).

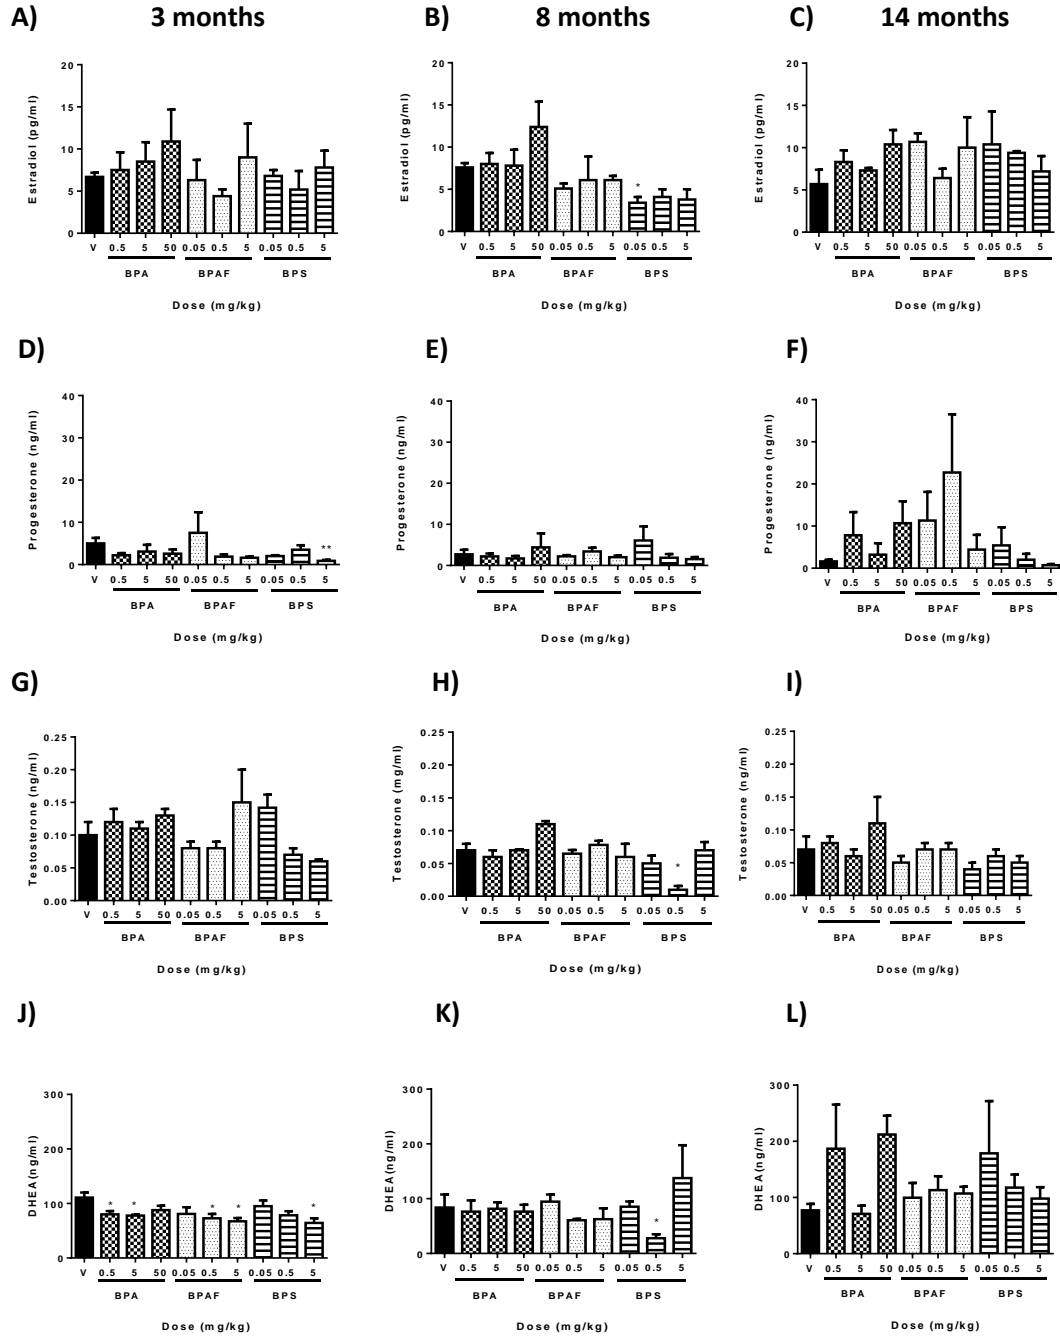

**Figure S2.** Effects of prenatal bisphenol A (BPA), bisphenol AF (BPAF), or bisphenol S (BPS) exposure on female serum hormone levels at 3, 8, and 14 months. A, D, G, and J = 3 months; B, E, H, and K = 8 months; and C, F, I, and L = 14 months. Mean  $\pm$  SEM. Litter n=2-6 per treatment group. \* $p < 0.05$  and \*\* $p < 0.01$  is statistically significant compared to vehicle control by ANOVA and Dunnett's test.

**Table S1. Record of vehicle and treated animals  $\geq$  3 months of age with mammary gland diagnoses by age**

| Age at Necropsy (Weeks)                   | 11-20* | 21-30 | 31-40* | 41-52 | 53 - 68*† | Total between weeks 1-68 |
|-------------------------------------------|--------|-------|--------|-------|-----------|--------------------------|
| Total number of animals                   | 90 [2] | [4]   | 54 [1] | [27]  | 140 [10]  | 284 [44]                 |
| Inflammation                              | 12     |       | 1      | 6     | 74        | 93                       |
| Ductal Squamous metaplasia                |        |       | 1      |       | 15        | 16                       |
| Lobuloalveolar hyperplasia                |        |       | 1      | 4     | 19        | 24                       |
| Miscellaneous (cyst, keratin, hemorrhage) |        |       |        |       | 9         | 9                        |
| Histiocytic Sarcoma                       |        |       |        |       | 1         | 1                        |
| Fibroadenoma                              |        |       |        |       | 1         | 1                        |
| Papillary Carcinoma                       |        |       |        |       | 1         | 1                        |
| Squamous Cell Carcinoma                   |        |       |        |       | 2         | 2                        |
| Adenocarcinoma/Carcinoma                  |        |       |        | 2     | 1         | 3                        |
| Total Neoplasia                           |        |       |        | 2     | 6         | 8                        |

[n] Animals with dermatitis, moribund, or found dead. Reason for death was determined or pathology was conducted, when possible.

\*Includes animals from scheduled necropsies at 3 mo (12 wk), 8 mo (32 wk) or 14 mo (56 wk)

†Some animals may have had multiple mammary diagnoses

**Table S2: Number of days (d) spent in estrus, diestrus and proestrus following in utero exposure to bisphenol A (BPA), bisphenol AF (BPAF), or bisphenol S (BPS) during postnatal days (PND) 63-83**

|                 | Estrus (d) | Diestrus (d) | Proestrus (d) |
|-----------------|------------|--------------|---------------|
| Vehicle         | 7.2 ± 4.0  | 11.7 ± 3.3   | 2.0 ± 1.0     |
| BPA 0.5 mg/kg   | 7.6 ± 2.9  | 11.4 ± 2.7   | 1.2 ± 1.3     |
| BPA 5 mg/kg     | 7.7 ± 2.7  | 11.0 ± 2.4   | 1.0 ± 0.6*    |
| BPA 50 mg/kg    | 6.1 ± 2.4  | 12.1 ± 3.1   | 1.4 ± 1.2     |
| BPAF 0.05 mg/kg | 7.3 ± 2.2  | 11.2 ± 2.9   | 1.5 ± 1.2     |
| BPAF 0.5 mg/kg  | 7.0 ± 2.3  | 11.7 ± 2.6   | 1.6 ± 1.0     |
| BPAF 5 mg/kg    | 5.6 ± 2.4  | 12.8 ± 1.4   | 1.4 ± 0.7     |
| BPS 0.05 mg/kg  | 7.5 ± 3.3  | 11.2 ± 3.8   | 1.7 ± 1.0     |
| BPS 0.5 mg/kg   | 6.0 ± 3.7  | 12.4 ± 4.0   | 1.3 ± 1.3     |
| BPS 5 mg/kg     | 6.7 ± 2.0  | 11.4 ± 2.2   | 1.7 ± 1.3     |

Data are presented as the mean number of days in that stage ± SEM.

Litter numbers: Vehicle (n = 9), BPA 0.5 (n = 12), BPA 5 (n = 12), BPA 50 (n = 9), BPAF 0.05 (n = 9), BPAF 0.5 (n = 11), BPAF 5 (n = 11), BPS 0.05 (n = 12), BPS 0.5 (n = 11) and BPS (n = 10).

Statistically significantly different from the control group by Dunnett's test at \*p < 0.05.
